# Supplementary material
Source: PubMed Central journal article supplement (PMC3833430)
Supplement: supp_140.23.4730_DEV099739.pdf [file supp_140.23.4730_DEV099739.pdf]

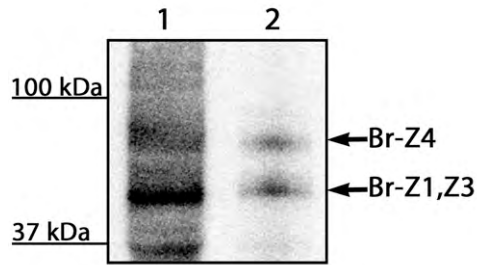

**Fig. S1. Expression of Br protein in nuclear extract from S2 cells.** Western blot with anti-Br-core show Br isoforms in S2 cell nuclear extract (lane 1) and tissue from third instar *w<sup>1118</sup>* wandering larvae (lane 2). The Br-Z4 isoform (~92 kDa) and the Br-Z1/Z3 isoforms (~75 kDa) are present in both S2 cell nuclear extract and in third instar larval tissue.

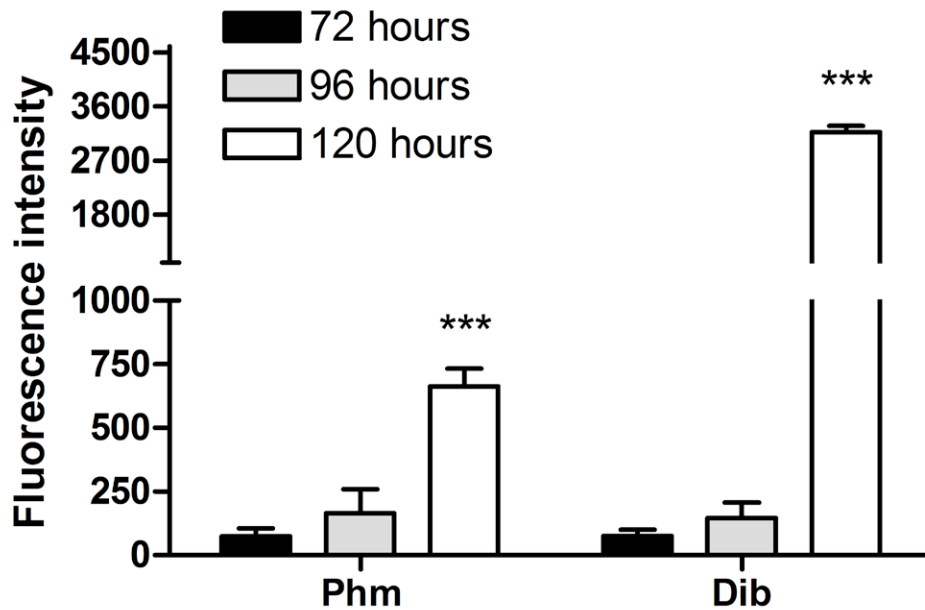

**Fig. S2. Quantification of Phm and Dib protein expression during the third instar.** Immunohistochemistry images (related to figure 3) of Phm and Dib expression during the third instar at 72, 96 and 120 hours AEL were subjected to image quantification analysis. Fluorescence intensity within the PG was quantified using Image J ( $n \geq 5$ ).

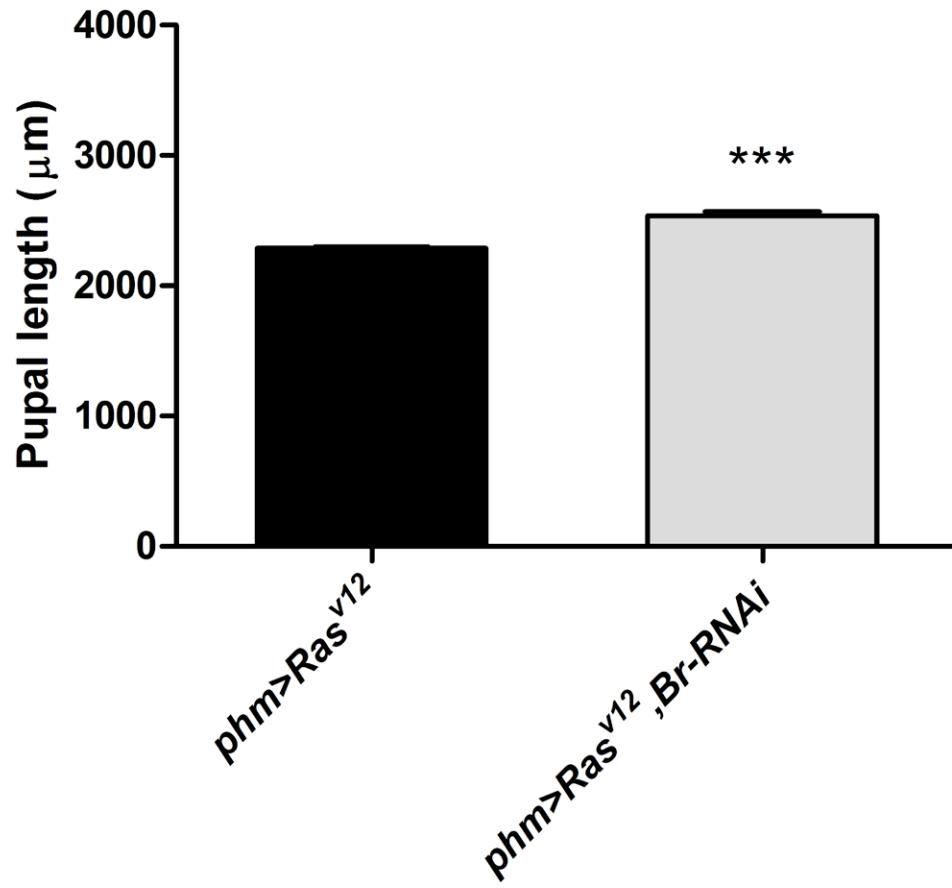

**Fig. S3. Reducing *Br* expression causes overgrowth in larvae overexpressing *Ras*<sup>V12</sup> in PG.** Effect on size of *Br-RNAi* in the PG of larvae overexpressing *Ras*<sup>V12</sup> (n=40-55).

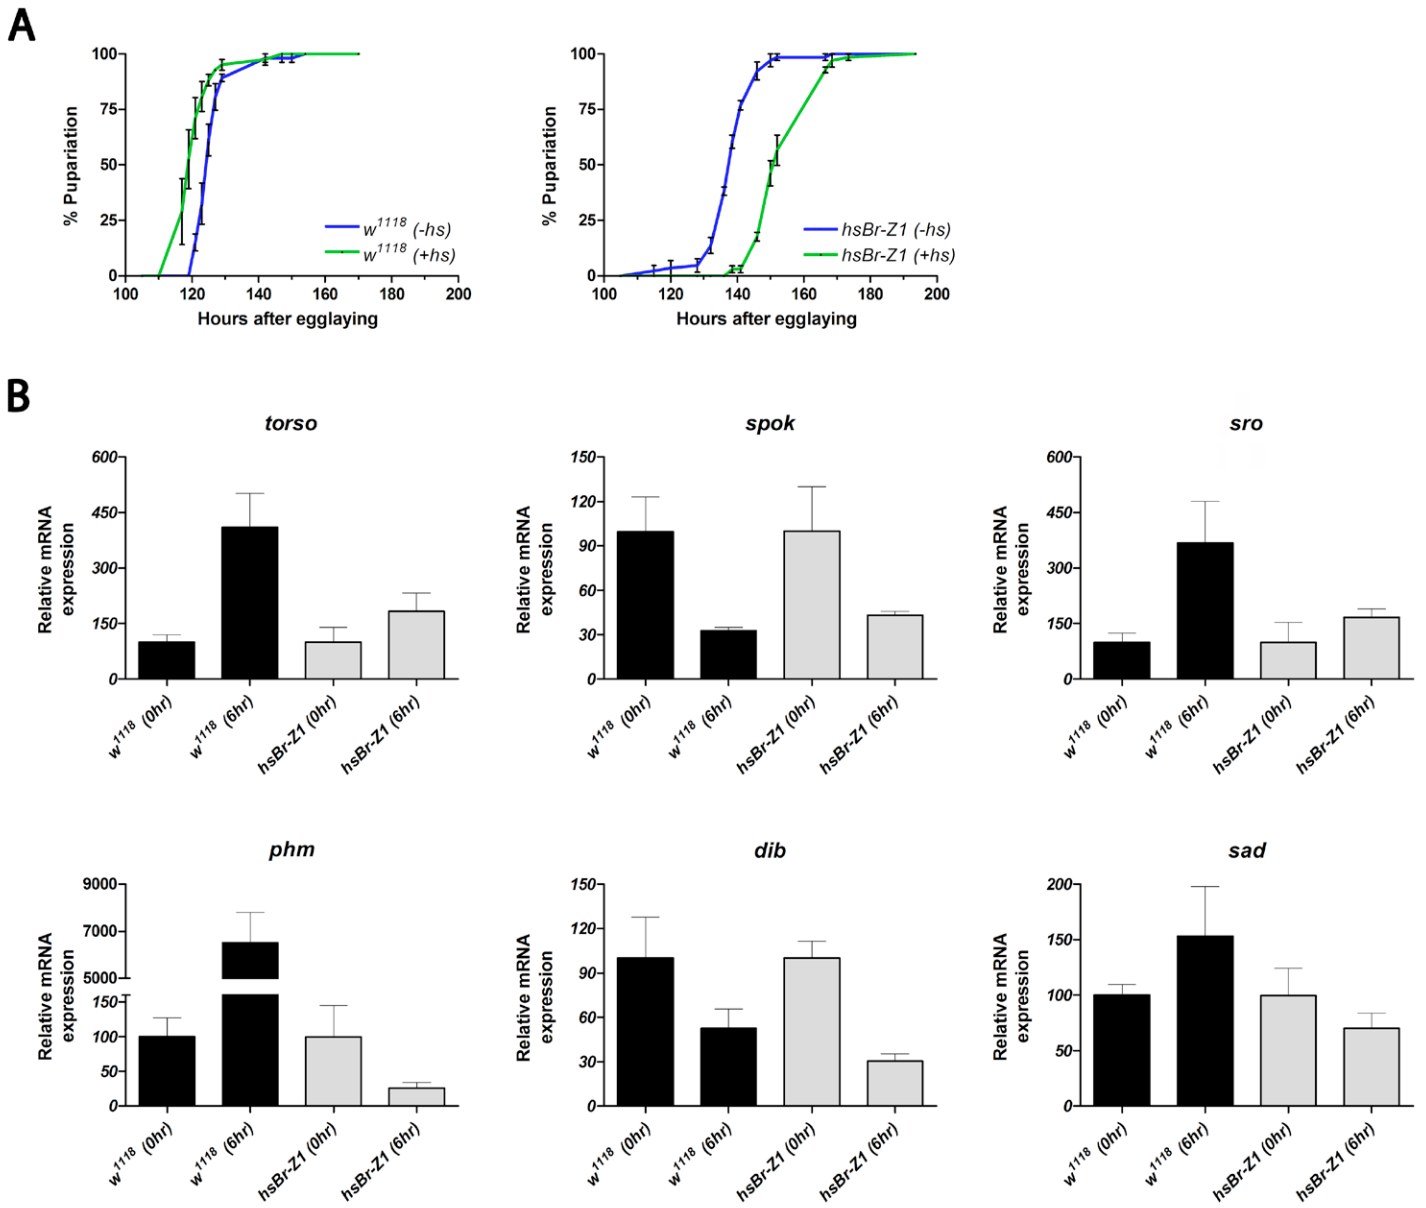

**Fig. S4. EcR and Br-Z1 are involved in negative feedback that inhibits PG steroidogenic activity after pupariation.** (A) Heat shock at 112 hours AEL (prior to the high level ecdysone pulse) delays pupariation of *hs-Br-Z1* larvae compared to non-heat shocked controls. Heat shock of wild type (*w<sup>1118</sup>*) larvae at this time does not delay pupariation (B) Heat shock induced Br-Z1 over-expression 112 hours AEL (T=0 hr) inhibits the developmental increase in expression of genes involved in ecdysone biosynthesis and *torso* (*tor*) observed 6 hours later (118 hours AEL: T=6 hr) in the *phm*>+ control.

**Table S1. Primers for amplification of genomic fragments**

| Name         | 5'-3'                             |
|--------------|-----------------------------------|
| <i>phmF1</i> | aatAGATCTcggcatatattatgggtctgc    |
| <i>phmF2</i> | aatAGATCTaggtagacggtcgattgaata    |
| <i>phmF3</i> | aatAGATCTcgaactgatcccagatttctac   |
| <i>phmF4</i> | aatAGATCTtgggtgtaatgaatgtgcatac   |
| <i>phmF5</i> | aatAGATCTgatgccgaaaccctgtatgct    |
| <i>phmF6</i> | aatAGATCTgtatatggtatatatgggtggca  |
| <i>phmF7</i> | aatAGATCTgagaatctgggaaccaagag     |
| <i>phmR1</i> | aataGCTAGCcacttctgattcctcctgctc   |
| <i>phmR2</i> | aataGCTAGCccttcttggttcccagattctc  |
| <i>phmR3</i> | aataGCTAGCtgccacacatatacatatac    |
| <i>phmR4</i> | aataGCTAGCaaggagagtgcgaaagtaaaatt |
| <i>dibF1</i> | tctggtcctcccttcggtcaccg           |
| <i>dibR1</i> | attcgtattcacgcagcagctga           |

Capital letters indicate restriction enzyme sites: *Bgl*III in forward (F) primers and *Nhe*I in reverse (R) primers.

**Table S2. Primers for site-directed mutagenesis**

| Name             | 5'-3'                                                                               |
|------------------|-------------------------------------------------------------------------------------|
| <i>phmF mut1</i> | CCCGGGCTGCAGGAATTCAGATCTTGGCATATGTGAATGTGCATACGAT<br>AAACGGGCAATTTC                 |
| <i>phmR mut1</i> | GAAATTGCCCGTTTATCGTATGCACATTCACATATGCCAAGATCTGAATT<br>CCTGCAGCCCGGG                 |
| <i>phmF mut2</i> | GCTGCAGGAATTCAGATCTTGGGTGTAATGAACATATGTACGATAAACG<br>GGCAATTTCAATTTCAAATTTACTTTTCGC |
| <i>phmR mut2</i> | GCGAAAGTAAAATTTGAAAATGAAATTGCCCGTTTATCGTACATATGTT<br>CATTACACCCAAGATCTGAATTCCTGCAGC |
| <i>phmF mut3</i> | CAGATCTTGGGTGTAATGAATGTGCATACGCATATGGGGCAATTTCAATTT<br>TCAAATTTACTTTTCGCACTC        |
| <i>phmR mut3</i> | GAGTGCAGAAAGTAAAATTTGAAAATGAAATTGCCCCATATGCGTATGCA<br>CATTACATTACACCCAAGATCTG       |
| <i>phmF mut4</i> | GGTGTAATGAATGTGCATACGATAAACGGGCAACATATGTTTCAAATTT<br>TACTTTTCGCACTCTCCTTCTTCG       |
| <i>phmR mut4</i> | CGAAGAAGGAGAGTGCAGAAAGTAAAATTTGAAACATATGTTGCCCGTTT<br>ATCGTATGCACATTCATTACACC       |
| <i>phmF mut5</i> | GCATACGATAAACGGGCAATTTCAATTTCAAATTCATATGTCGCACTCTC<br>CTTCTTCGATGCCGAAACCC          |
| <i>phmR mut5</i> | GGGTTTCGGCATCGAAGAAGGAGAGTGCACATATGAATTTGAAAATGA<br>AATTGCCCGTTTATCGTATGC           |

**Table S3. EMSA oligos**

| Name                                                      | Forward, 5'-3'                              | Reverse, 5'-3'                    |
|-----------------------------------------------------------|---------------------------------------------|-----------------------------------|
| ** <i>phm</i><br><i>Br-</i><br><i>Z1/Z4</i>               | GCAATTT <u>CATTTTCAAATTTCCCTG</u> TCGC      | TGCGACAGGGAAATTTGAAAATG<br>AAATTG |
| ** <i>phm</i><br><i>Br-</i><br><i>Z1/Z4</i><br><i>mut</i> | GCAATTT <u>CATCCCTGAATTTCCCTG</u> TCGC<br>C | TGCGACAGGGAAATTCAGGGATG<br>AAATTG |
| <i>dib Br-</i><br><i>Z4</i>                               | TGAGCTAACGGAAACAGATCAGCA                    | GTGCTGATCTGTTTCCGTTAGCTC          |
| <i>dib Br-</i><br><i>Z4 mut</i>                           | TGAGCTAAC <u>CCCTG</u> CAGATCAGCA           | GTGCTGATCTGCAGGGGTTAGCT<br>C      |
| *** <i>Br-</i><br><i>Z4/Z1</i>                            | CCTTTTTTTTTTATTTATGAAGTAATT                 | GAATTACTTCATAAATAAAAAAA<br>AAAG   |
| Non-<br>specific                                          | AACGTAGCTGATCGAATCGGTTAC                    | AGTAACCGATTCGATCAGCTACG<br>T      |

Mutations introduced are underlined.

\*\*Oligos have a mutated downstream Br-Z3 site allowing the study of Br-Z1/Z4 site alone.

\*\*\*Oligos described in Wang et al. (Wang et al., 2009).

**Table S4. qPCR primers**

| Name                       | Forward, 5'-3'          | Reverse, 5'-3'           |
|----------------------------|-------------------------|--------------------------|
| * <i>rpL23</i>             | GACAACACCCGGAGCCAAGAACC | GTTTGCGCTGCCGAATAACCAC   |
| <i>E74A</i>                | TTTCTCTGCCGTTGTCGTC     | GCACTGAGACCCGCTCAC       |
| <i>E74B</i>                | CGCGAGTTCAAAGTGCTCTA    | GGAGGGAGAGTGGTGGTGT      |
| <i>E75B</i>                | CAACAGCAACAACACCCAGA    | CAGATCGGCACATGGCTTT      |
| * <i>phantom (phm)</i>     | GGATTTCTTTTCGGCGCGATGTG | TGCCTCAGTATCGAAAAGCCGT   |
| * <i>disembodied (dib)</i> | TGCCCTCAATCCCTATCTGGTC  | ACAGGGTCTTCACACCCATCTC   |
| * <i>spookier (spok)</i>   | TATCTCTTGGGCACACTCGCTG  | GCCGAGCTAAATTTCTCCGCTT   |
| * <i>neverland (nvd)</i>   | GGAAGCGTTGCTGACGACTGTG  | TAAAGCCGTCCACTTCCTGCGA   |
| * <i>shadow (sad)</i>      | CCGCATTCAGCAGTCAGTGG    | ACCTGCCGTGTACAAGGAGAG    |
| <i>shroud (sro)</i>        | AGCAGCTGAAGGTCGATAGC    | GCGATTCGTGGCAGTAAAC      |
| <i>torso (tor)</i>         | TGCTTGGATTGGTATCCCTATAA | TGGGTACACAGTAAGATTCTCTGG |
| <i>Br-Z4</i>               | CAAAGGCACACACACACACA    | TCGGTCGGTTCTTCTCCTTC     |
| <i>Br-Z1</i>               | CCAGACCAACACCCACACAC    | ACATTCGCTTCCTTCGTCCT     |

\*Primers described previously (McBrayer et al., 2007).
